# Supplementary material for: Effectiveness of SMS Technology on Timely Community Health Worker Follow-Up for Childhood Malnutrition: A Retrospective Cohort Study in sub-Saharan Africa
Source: Glob Health Sci Pract. 2018 Jun 27;6(2):345–55. doi: 10.9745/GHSP-D-16-00290 (PMC6024632; doi:10.9745/GHSP-D-16-00290)
Supplement: 16-00290-Sarma-Supplement1.xlsx [file 16-00290-Sarma-Supplement1.xlsx]

## Sheet: PostHocPowerSS
SUPPLEMENT 1. Post-Hoc Power and Sample Size Calculations by Site
					Uganda	Ghana	Senegal	Rwanda
Estimated power for two-sample comparison of proportions					1	1	1	1
Proportion 1 (Data Entry with Timely Reading)					0.7819	0.4561	0.2168	0.5905
Proportion 2 (SMS with Timely Reading)					0.9151	0.8475	0.3995	0.9244
Sample Size 1 (Data Entry)					86170	1070	1248	1253
Sample Size 2 (SMS)					10799	6044	3576	1651
Estimated sample size for two-sample comparison of proportions
Power at 0.90					165	34	143	39
Power at 0.80					128	27	110	31
