# Supplementary material for: Effectiveness of SMS Technology on Timely Community Health Worker Follow-Up for Childhood Malnutrition: A Retrospective Cohort Study in sub-Saharan Africa
Source: Glob Health Sci Pract. 2018 Jun 27;6(2):345–55. doi: 10.9745/GHSP-D-16-00290 (PMC6024632; doi:10.9745/GHSP-D-16-00290)
Supplement: 16-00290-Sarma-Supplement3-Ghana.xlsx [file 16-00290-Sarma-Supplement3-Ghana.xlsx]

## Sheet: Descriptive Stats
TABLE 1: DESCRIPTIVE STATISTICS: Baseline Characteristics of the Participants
UNDER-5 CHILDREN	N=2,561
Total Number of Encounters for Under-5 Children	10878
Total Number of Encounters of Under-5 Children with MUAC readings*	8470
HOUSEHOLDS	N = 4956
COMMUNITY HEALTH WORKERS	N =78
*Children between 6 months and 5 years selected for MUAC readings

## Sheet: Exposure Stratified
SUPPLEMENT 3.
Population Characteristics Stratified by Type of Data Entry, Bonsaaso, Ghana
	EXPOSURE VARIABLE
	Type of Data Entry
CHARACTERISTIC	Paper (n of encounters)	%	SMS (n of encounters, %)	%	Total Number of Encounters (n)	P-VALUE
UNDER-5 CHILDREN
Age (months)						*<0.001
6-12 (1 year) (REF)	117	0.0925633	1147	0.907437	1264	REF
12-18	142	0.104797	1213	0.895203	1355	0.799
18-24 (2 years)	137	0.135509	874	0.864491	1011	0.013
24-30	157	0.16973	768	0.83027	925	<0.001
30-36 (3 years)	136	0.12746	931	0.87254	1067	0.051
36-42	96	0.102894	837	0.897106	933	0.932
42-48 (4 years)	101	0.128173	687	0.871827	788	0.065
48-54	97	0.163575	496	0.836425	593	<0.001
54-60 (5 years)	75	0.140449	459	0.859551	534	0.018
Total	1058	0.124911	7412	0.875089	8470
Gender						*0.343
Male	479	0.121266	3471	0.878734	3950	REF
Female	579	0.128097	3941	0.871903	4520	0.343
Total	1058	0.124911	7412	0.875089	8470
HOUSEHOLDS
Number of Under-5 Children in Each Household Categorized						*<0.001
1	460	0.101121	4089	0.898879	4549	REF
2	386	0.133564	2504	0.866436	2890	<0.001
3	149	0.203552	583	0.796448	732	<0.001					.
4	49	0.269231	133	0.730769	182	<0.001
5	7	0.583333	5	0.416667	12	<0.001
Total	1051	0.125643	7314	0.874357	8365
Age Groups for Household Heads (in years)						*<0.001
0-15	1	0.0416667	23	0.958333	24	0.309
15-25	65	0.0995406	588	0.900459	653	0.448
25-35 (REF)	361	0.109626	2932	0.890374	3293	REF
35-45	318	0.127916	2168	0.872084	2486	0.033
45-55	215	0.152916	1191	0.847084	1406	<0.001
55-65	76	0.182692	340	0.817308	416	<0.001
>=65	36	0.167442	179	0.832558	215	0.01
Total	1072	0.126222	7421	0.873778	8493
Household Head Gender						*0.292
Male	907	0.127927	6183	0.872073	7090	REF
Female	165	0.117689	1237	0.882311	1402	0.292
Total	1072	0.126236	7420	0.873764	8492
COMMUNITY HEALTH WORKERS
Number of Under-5 Children per Community Health Worker						*0.811
1 (Range: 0-22)	150	0.129422	1009	0.870578	1159	REF
2 (Range: 23-61)	414	0.123324	2943	0.876676	3357	0.588
3 (Range: 62 and above)	494	0.124937	3460	0.875063	3954	0.686
Total	1058	0.124911	7412	0.875089	8470

## Sheet: Outcome Stratified
Population Characteristics Stratified by Outcome (Timely MUAC Readings), Bonsaaso, Ghana
	OUTCOME VARIABLE
	MUAC READINGS WITHIN 90 DAYS OF PREVIOUS VISIT
CHARACTERISTIC	NO (n of encounters)	%	YES (n of encounters, %)	%	Total Number of Encounters (n)	P-VALUE
UNDER-5 CHILDREN
Age (months)						<0.001*
6-12 (1 year) (REF)	436	0.326837	898	0.673163	1334	REF
12-18	232	0.195616	954	0.804384	1186	<0.001
18-24 (2 years)	203	0.231207	675	0.768793	878	<0.001
24-30	239	0.29875	561	0.70125	800	<0.001
30-36 (3 years)	217	0.230851	723	0.769149	940	<0.001
36-42	158	0.195303	651	0.804697	809	<0.001
42-48 (4 years)	189	0.270386	510	0.729614	699	<0.001
48-54	145	0.289421	356	0.710579	501	<0.001
54-60 (5 years)	167	0.376126	277	0.623874	444	<0.001
Under 6 months	1058	1058	1058	1058	1058
Total	3043	0.35167	5610	0.64833	8653
Gender						0.251*
Male	948	0.267721	2593	0.732279	3541	REF
Female	1037	0.256113	3012	0.743887	4049	0.251
Total	1985	0.261528	5605	0.738472	7590
HOUSEHOLDS
Number of Under-5 Children in Each Household Categorized						0.002*
1	1146	0.281296	2928	0.718704	4074	REF
2	614	0.237157	1975	0.762843	2589	<0.001
3	149	0.221726	523	0.778274	672	0.001
4	45	0.276074	118	0.723926	163	0.884
5	7	0.7	3	0.3	10	0.01
Total	1961	0.261188	5547	0.738812	7508
Age Groups for Household Heads (in years)						<0.001*
0-15	7	0.333333	14	0.666667	21	0.302
15-25	570	0.59375	390	0.40625	960	<0.001
25-35 (REF)	1796	0.446655	2225	0.553345	4021	REF
35-45	1400	0.461894	1631	0.538106	3031	0.203
45-55	609	0.387158	964	0.612842	1573	<0.001
55-65	191	0.422566	261	0.577434	452	0.329
>=65	101	0.446903	125	0.553097	226	0.994
Total	4674	0.454492	5610	0.545508	10284
Household Head Gender						0.882*
Male	3945	0.454127	4742	0.545873	8687	REF
Female	728	0.45614	868	0.54386	1596	0.882
Total	4673	0.454439	5610	0.545561	10283
COMMUNITY HEALTH WORKERS
Number of Under-5 Children per Community Health Worker						<0.001*
1 (Range: 0-25)	406	0.235499	1318	0.764501	1724	REF
2 (Range: 26-59)	379	0.229141	1275	0.770859	1654	0.662
3 (Range: 60-89)	384	0.192965	1606	0.807035	1990	0.002
4 (Range: 89 and above)	816	0.367237	1406	0.632763	2222	<0.001
Total	1985	0.261528	5605	0.738472	7590
*P-value from logistic regression between categorical variable as a whole and lead_m_le90days

## Sheet: Multivariate Regression
MULTIVARIATE MODEL - Crude and Adjusted Odds Ratios (with 95% Confidence Intervals), Bonsaaso, Ghana
CHARACTERISTIC	CRUDE1			CRUDE2						MODEL 1 (INTERACTION)*			MODEL 2 (CONFOUNDERS & INTERACTION) §
MULTIPLICATIVE INTERACTION	OR	95% CI		OR	95% CI					OR	95% CI		OR	95% CI
Source_m	6.65893	5.79318	7.65405							2.52011	0.578833	10.972	1.77845	0.393557	8.03669
Lead_source_m				2.09602	1.6514	2.66036				0.1614	0.11647	0.223664	0.171834	0.121092	0.243839
Source_m_Interaction (Source_m*Lead_Source_m)										7.35281	1.65222	32.7219	10.7812	2.32532	49.9864
CHARACTERISTIC	CRUDE1			CRUDE2						MODEL 1 (INTERACTION)*			MODEL 2 (CONFOUNDERS & INTERACTION) §
MULTIPLICATIVE INTERACTION	OR	95% CI		OR	95% CI					OR	95% CI		OR	95% CI
Source_m	6.65893	5.79318	7.65405							2.52011	0.578833	10.972	2.01703	0.435566	9.34057
Lead_source_m				2.09602	1.6514	2.66036				0.1614	0.11647	0.223664	0.16526	0.117054	0.23332
Source_m_Interaction (Source_m*Lead_Source_m)										7.35281	1.65222	32.7219	9.03558	1.90643	42.8244
*Testing for Multiplicative Interaction by Source Type: Either SMS used in both consecutive encounters or not
§ Final Model Adjusted for Interaction and significant confounders
Gender of under-5 children and gender of household head excluded from Model 2 and Model 3 because of no statistical significance with outcome variable (p>0.10) from outcome stratified analysis
CHARACTERISTIC	CRUDE			MODEL 1 *			MODEL 2*			MODEL 2 **			MODEL 3 (CONFOUNDERS & INTERACTION) §
ADDITIVE INTERACTION	OR	95% CI		OR	95% CI		OR	95% CI		OR	95% CI		OR	95% CI
Source_m	6.65893	5.79318	7.65405
Lead_source_m				2.09602	1.6514	2.66036
Source_sum (source_m + lead_source_m)							2.26376	2.03971	2.51242	2.26376	2.03971	2.51242	2.26898	2.02935	2.53692
Model 1*: Logistic regression with outcome and lead_source_m only
Model 2**: Logistic regression with outcome and source_sum only
Model 3§: Logistic regression with outcome, significant confounders, and source_sum
CHARACTERISTIC	CRUDE1			CRUDE2			MODEL 2*			CRUDE3			CRUDE4
DOSE RESPONSE	OR	95% CI		OR	95% CI		OR	95% CI		OR	95% CI		OR	95% CI
Paper-Paper (0)	0.462198	0.363129	0.588296
Paper-SMS (1)				0.0612948	0.0476623	0.0788267
SMS-Paper (2)										1.25581	0.292913	5.3841
SMS-SMS (3)													6.41357	5.37385	7.65444
*Each is a separate logistic regression with source type and outcome
CHARACTERISTIC	CRUDE			MODEL 1 (CONFOUNDERS)
DOSE RESPONSE	OR	95% CI		OR	95% CI													.
Paper-Paper (0)	REF	REF	REF	REF	REF	REF												.
Paper-SMS (1)	0.1614	0.11647	0.223664	0.16526	0.117054	0.23332
SMS-Paper (2)	2.52011	0.578833	10.972	2.01703	0.435566	9.34057
SMS-SMS (3)	2.99072	2.33692	3.82744	3.01188	2.32171	3.90722
*Logistic regression with source type and outcome using Paper-Paper as reference
CHARACTERISTIC	CRUDE			MODEL 1 (CONFOUNDERS)
NO SMS VS. ANY SMS VS. ALL SMS	OR	95% CI		OR	95% CI
Paper-Paper (0) - NONE	REF	REF	REF	REF	REF	REF
Paper-SMS or SMS-Paper or SMS-SMS (1) - ANY	0.0081372	0.0061243	0.0108117	0.0213611	0.0157626	0.028948
SMS-SMS (2) - ALL	2.99072	2.33692	3.82744	3.10197	2.39345	4.02023
CHARACTERISTIC	CRUDE			MODEL 1 (CONFOUNDERS)
NONE VS. ANY SMS	OR	95% CI		OR	95% CI
Paper-Paper (0) - NONE	REF	REF	REF	REF	REF	REF
Paper-SMS or SMS-Paper or SMS-SMS (1) - ANY	0.288991	0.229681	0.363617	0.725374	0.570601	0.922127

## Sheet: Raw data
			lead_m_le9~s	Odds Ratio	Std. Err.	z	P>z	[95% Conf.	Interval]
			source_m	1.77845	1.36859	0.75	0.454	0.393557	8.03669
			lead_sourc~m	0.171834	0.0306835	-9.86	0	0.121092	0.243839
			source_m_i~n	10.7812	8.4378	3.04	0.002	2.32532	49.9864
			agecat2	1.26529	0.204101	1.46	0.145	0.92233	1.73578
			agecat3	1.22076	0.205908	1.18	0.237	0.877119	1.69905
			agecat4	1.22683	0.207571	1.21	0.227	0.880575	1.70924
			agecat5	1.31141	0.220891	1.61	0.108	0.942681	1.82437
			agecat6	1.84721	0.342662	3.31	0.001	1.28415	2.65715
			agecat7	1.10285	0.200924	0.54	0.591	0.77168	1.57613
			agecat8	1.01483	0.196424	0.08	0.939	0.694446	1.48301
			agecat9	3.16167	0.952158	3.82	0	1.75215	5.70508
			under5hohh2	1.01015	0.100116	0.1	0.919	0.83181	1.22673
			under5hohh3	1.12712	0.178776	0.75	0.451	0.825962	1.53809
			under5hohh4	0.619813	0.151692	-1.95	0.051	0.383653	1.00134
			under5hohh5	0.268552	0.242561	-1.46	0.146	0.0457305	1.57707
			agecathohh1	0.49419	0.288851	-1.21	0.228	0.15717	1.55387
			agecathohh2	0.761596	0.12685	-1.64	0.102	0.549477	1.0556
			agecathohh4	1.00114	0.111156	0.01	0.992	0.805358	1.24453
			agecathohh5	1.25349	0.173609	1.63	0.103	0.955494	1.64442
			agecathohh6	0.914075	0.187467	-0.44	0.661	0.611518	1.36632
			agecathohh7	0.79634	0.231654	-0.78	0.434	0.450284	1.40835
			chwquartile2	1.00611	0.169146	0.04	0.971	0.723677	1.39878
			chwquartile3	0.395702	0.0687166	-5.34	0	0.281547	0.556142
			chwquartile4	0.228111	0.0384844	-8.76	0	0.163886	0.317506
			lead_m_le9~s	Odds Ratio	Std. Err.	z	P>z	[95% Conf.	Interval]
			source_m	2.01703	1.57737	0.9	0.37	0.435566	9.34057
			lead_sourc~m	0.16526	0.0290802	-10.23	0	0.117054	0.23332
			source_m_i~n	9.03558	7.17299	2.77	0.006	1.90643	42.8244
			agecat2	1.29146	0.205634	1.61	0.108	0.945257	1.76447
			agecat3	1.21629	0.202683	1.18	0.24	0.877388	1.68609
			agecat4	1.30831	0.221802	1.59	0.113	0.938437	1.82397
			agecat5	1.40298	0.233328	2.04	0.042	1.01272	1.94363
			agecat6	1.94079	0.356761	3.61	0	1.35366	2.78259
			agecat7	1.19092	0.213865	0.97	0.331	0.837573	1.69332
			agecat8	1.07137	0.204928	0.36	0.719	0.736417	1.55867
			agecat9	3.61101	1.07954	4.29	0	2.00981	6.48786
			under5_hohh	0.948999	0.0546369	-0.91	0.363	0.847733	1.06236
			agecathohh1	0.541484	0.320212	-1.04	0.3	0.16991	1.72565
			agecathohh2	0.744004	0.123007	-1.79	0.074	0.538078	1.02874
			agecathohh4	0.987565	0.108169	-0.11	0.909	0.79677	1.22405
			agecathohh5	1.20943	0.164597	1.4	0.162	0.92627	1.57916
			agecathohh6	0.85862	0.172318	-0.76	0.448	0.579391	1.27242
			agecathohh7	0.862089	0.250037	-0.51	0.609	0.488284	1.52206
			under5_chw	0.988789	0.0009204	-12.11	0	0.986987	0.990595
			lead_m_le9~s	Odds Ratio	Std. Err.	z	P>z	[95% Conf.	Interval]
			source_sum	2.26898	0.129217	14.39	0	2.02935	2.53692
			agecat2	1.25543	0.191673	1.49	0.136	0.930749	1.69336
			agecat3	1.19118	0.191516	1.09	0.277	0.869203	1.63242
			agecat4	1.17763	0.190109	1.01	0.311	0.858217	1.61593
			agecat5	1.27174	0.201695	1.52	0.13	0.931961	1.73538
			agecat6	1.60845	0.278152	2.75	0.006	1.14606	2.25739
			agecat7	1.23793	0.215801	1.22	0.221	0.879652	1.74213
			agecat8	1.1177	0.207536	0.6	0.549	0.776733	1.60834
			agecat9	3.88238	1.14059	4.62	0	2.18287	6.90509
			under5_hohh	0.936697	0.0512166	-1.2	0.232	0.841506	1.04266
			agecathohh1	0.558479	0.313631	-1.04	0.3	0.185776	1.6789
			agecathohh2	0.769475	0.121955	-1.65	0.098	0.56401	1.04979
			agecathohh4	1.00516	0.105189	0.05	0.961	0.818765	1.234
			agecathohh5	1.29019	0.168662	1.95	0.051	0.998568	1.66697
			agecathohh6	0.834917	0.157993	-0.95	0.34	0.576194	1.20981
			agecathohh7	0.843027	0.233296	-0.62	0.537	0.490098	1.4501
			under5_chw	0.988528	0.0008765	-13.01	0	0.986812	0.990247
			lead_m_le9~s	Odds Ratio	Std. Err.	z	P>z	[95% Conf.	Interval]
			netsource2	0.16526	0.0290802	-10.23	0	0.117054	0.23332
			netsource3	2.01703	1.57737	0.9	0.37	0.435566	9.34057
			netsource4	3.01188	0.399945	8.3	0	2.32171	3.90722
			agecat2	1.29146	0.205634	1.61	0.108	0.945257	1.76447
			agecat3	1.21629	0.202683	1.18	0.24	0.877388	1.68609
			agecat4	1.30831	0.221802	1.59	0.113	0.938437	1.82397
			agecat5	1.40298	0.233328	2.04	0.042	1.01272	1.94363
			agecat6	1.94079	0.356761	3.61	0	1.35366	2.78259
			agecat7	1.19092	0.213865	0.97	0.331	0.837573	1.69332
			agecat8	1.07137	0.204928	0.36	0.719	0.736417	1.55867
			agecat9	3.61101	1.07954	4.29	0	2.00981	6.48786
			under5_hohh	0.948999	0.0546369	-0.91	0.363	0.847733	1.06236
			agecathohh1	0.541484	0.320212	-1.04	0.3	0.16991	1.72565
			agecathohh2	0.744004	0.123007	-1.79	0.074	0.538078	1.02874
			agecathohh4	0.987565	0.108169	-0.11	0.909	0.79677	1.22405
			agecathohh5	1.20943	0.164597	1.4	0.162	0.92627	1.57916
			agecathohh6	0.85862	0.172318	-0.76	0.448	0.579391	1.27242
			agecathohh7	0.862089	0.250037	-0.51	0.609	0.488284	1.52206
			under5_chw	0.988789	0.0009204	-12.11	0	0.986987	0.990595
